# Supplementary material for: TFH cells accumulate in mucosal tissues of humanized-DRAG mice and are highly permissive to HIV-1
Source: PubMed Central journal article supplement (PMC4451806; doi:10.1038/srep10443), 2015-06-02
Supplement: srep10443-s1.pdf [file srep10443-s1.pdf]

**T<sub>FH</sub> cells accumulate in mucosal tissues of humanized-DRAG mice and are highly permissive to HIV-1**

Atef Allam<sup>1,2\*</sup>, Sai Majji<sup>3</sup>, Kristina Peachman<sup>1,2</sup>, Linda Jagodzinski<sup>1</sup>, Jiae Kim<sup>1,2</sup>, Silvia Ratto-Kim<sup>1,2</sup>, Wathsala Wijayalath<sup>3</sup>, Melanie Merbah<sup>1,2</sup>, Jerome H. Kim<sup>1</sup>, Nelson L. Michael<sup>1</sup>, Carl R. Alving<sup>1</sup>, Sofia Casares<sup>3</sup> and Mangala Rao<sup>1\*</sup>

<sup>1</sup>US Military HIV Research Program, Walter Reed Army Institute of Research and <sup>2</sup>Henry M. Jackson Foundation for the Advancement of Military Medicine, Bethesda, Maryland, USA. <sup>3</sup>US Military Malaria Vaccine Program, Naval Medical Research Center, Silver Spring, Maryland, USA;

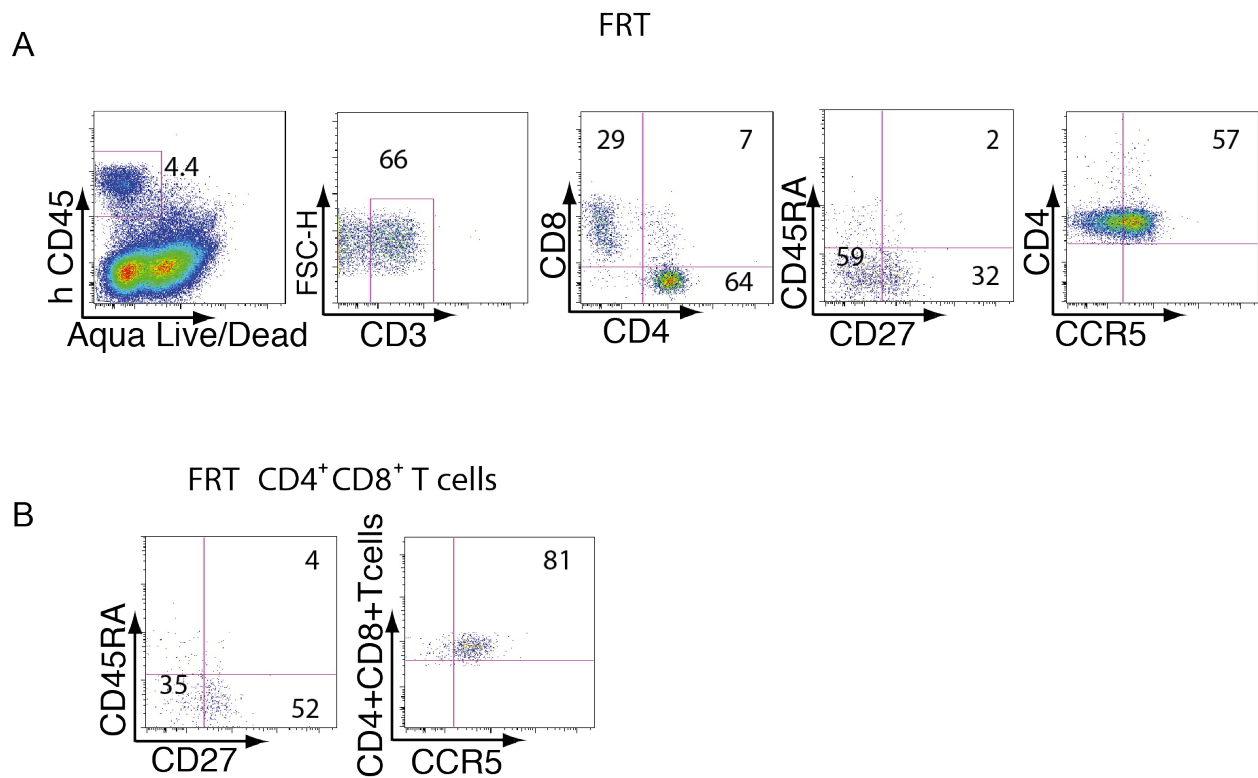

**Supplementary Figure 1. The reconstitution of human cells in FRT of humanized DRAG mice.** (a) A representative flow cytometry plot shows the reconstitution of human cells in the FRT of a DRAG mouse. Cells were stained with Aqua LIVE/DEAD and anti-hCD45 antibody (left panel). The frequency of T cells is shown in the second panel. Gated CD3<sup>+</sup> T cells were stained for CD4 and CD8 (third panel). CD4<sup>+</sup> T cell memory and naïve subsets were identified based on the expression of CD45RA and CD27 (fourth panel), and the frequency of CCR5 expressing CD4 T cells is shown in the right panel. (b) Shows the memory phenotype of CD4<sup>+</sup>CD8<sup>+</sup> T cells (left panel). The gated CD4<sup>+</sup>CD8<sup>+</sup> T cells were analyzed for CCR5 expression (right panel).

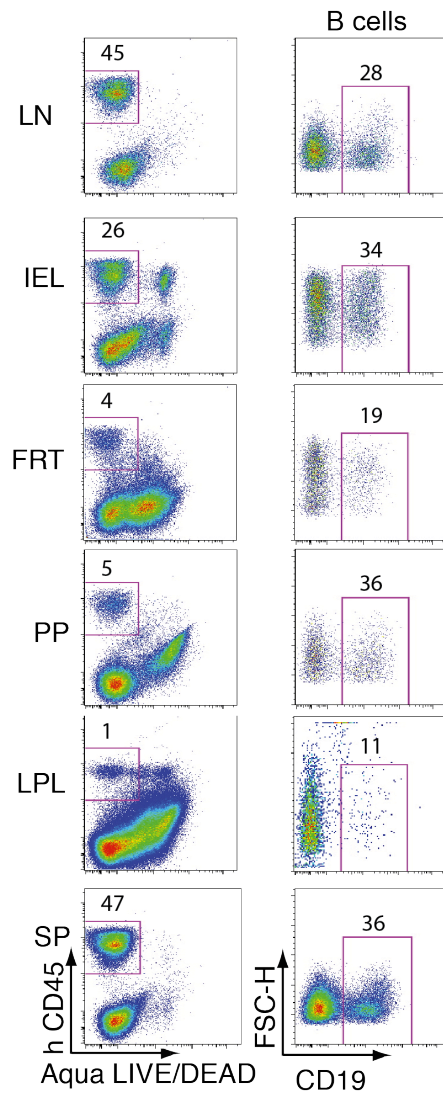

**Supplementary Figure 2. Distribution of human B cells in the indicated tissues.**

A representative flow cytometry plot depicts the proportion of human B cells in the indicated tissues of a humanized DRAG mouse. Cells were stained with Aqua LIVE/DEAD and anti-hCD45 antibody (left column), and were gated for CD19 expressing cells (B cells) (right column).

A

LPL  
PP → Isolate single cell suspension → Load on Percoll gradient  
FRT

Stain for human CD45 and CD19 → Sort-I: sort B cells (CD45+CD19+) and CD45+ CD19- cells

Stain B cells for CD38 and IgD → Sort-II: sort for memory B cells (CD38+IgD-)

Stain CD45+CD19- cells with CD45RA, CD3, CD8, PD-1 and CXCR5

→ Sort-III sort for CD45RA+CD3+CD8- CXCR5+PD-1++  
or CD45RA+CD3+CD8- CXCR5+PD-1+ cells

B

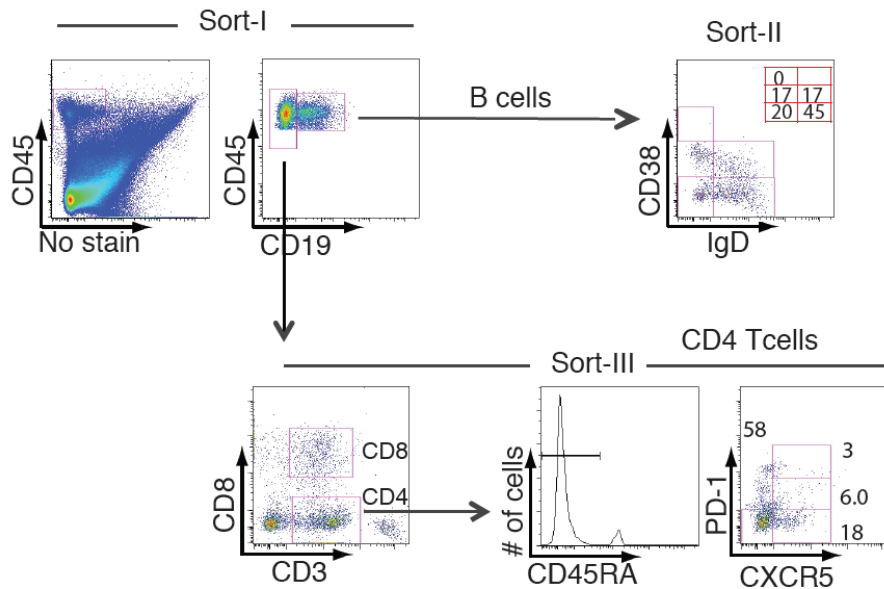

**Supplementary Figure 3. Cell sorting procedure for FRT.** (a) A schematic for the cell sorting procedure for FRT and LPL is shown on the top. (b) A representative flow cytometry dot plot sort for B and T<sub>FH</sub> cells is shown for FRT of a humanized DRAG mouse. The entire sorting experiment was performed twice with tissues pooled from 2 mice in each case.

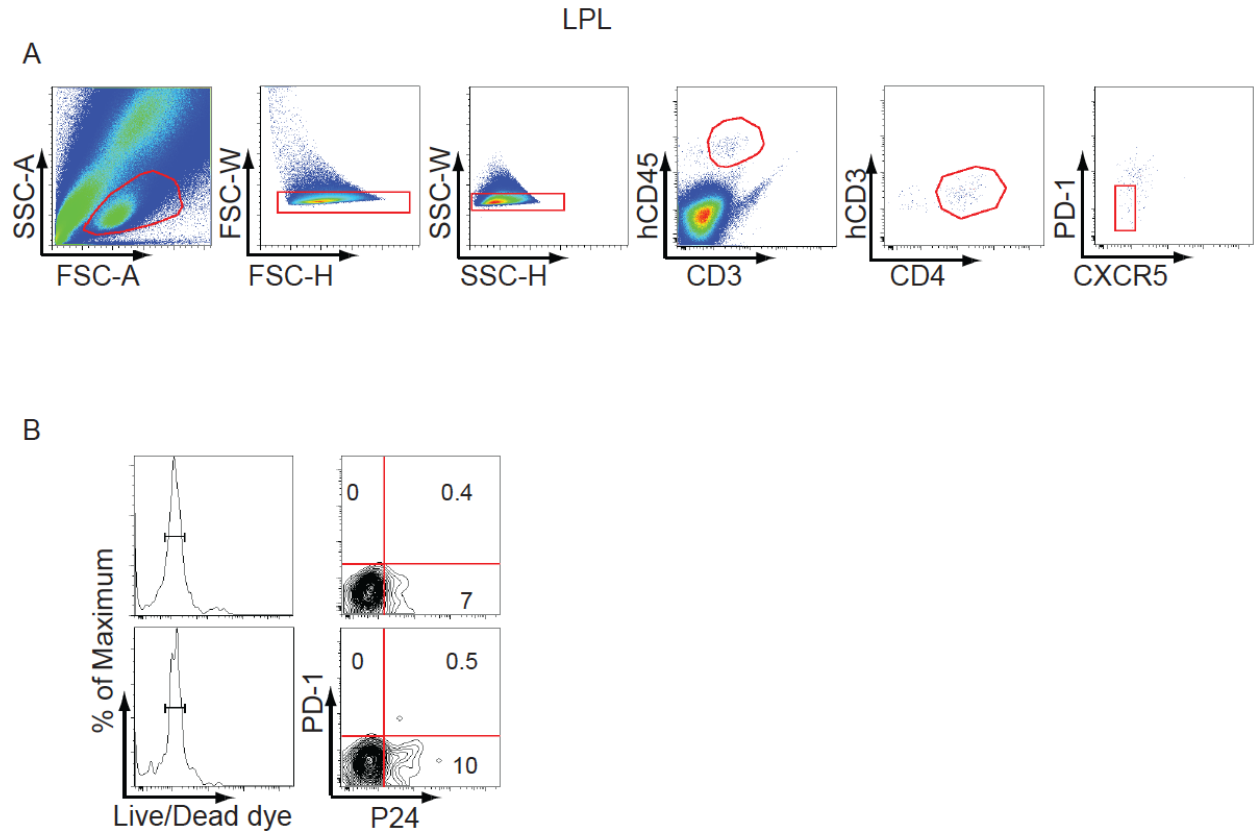

**Supplementary Figure 4. HIV-1 infection does not upregulate PD-1 expression during early infection.** (a) Cells were harvested and pooled from the LPL of 4 humanized DRAG mice then separated on a percoll gradient. Cells were stained for hCD45, CD3, CD4, PD-1 and CXCR5 and sorted using BD FACS Aria. Sorted cells ( $hCD45^+CD3^+CD4^+PD-1^-CXCR5^-$ ) were washed then infected with primary HIV-1 for 3 days as indicated in the Methods section. (b) Cells in duplicate were labeled with Aqua Live/Dead dye, washed, fixed, permeabilized, stained for PD-1, CXCR5, and p24, and then analyzed on a LSRII. Cells were gated for Aqua Live/Dead dye and then live cells were gated for PD-1 and p24.
